# Supplementary material for: Histamine Control in Raw and Processed Tuna: A Rapid Tool Based on NIR Spectroscopy
Source: MDPI journal article supplement (doi:10.3390/foods10040885), 2021-04-18
Supplement: s1 [file s1]

SUPPLEMENTARY MATERIAL

# NIR spectroscopy as a rapid tool for histamine control in raw and processed tuna

Sergio Ghidini <sup>1</sup>, Luca Maria Chiesa <sup>2</sup>, Sara Panseri <sup>2,\*</sup>, Maria Olga Varrà <sup>1</sup>, Adriana Ianieri <sup>1</sup>, Davide Pessina <sup>3</sup> and Emanuela Zanardi <sup>1</sup>

<sup>1</sup> Department of Food and Drug, University of Parma, Strada del Taglio 10, 43126 - Parma, Italy; sergio.ghidini@unipr.it; mariaolga.varra@unipr.it; adriana.ianieri@unipr.it; emanuela.zanardi@unipr.it

<sup>2</sup> Department of Health, Animal Science and Food Safety, University of Milan, 6 20133 - Milan, Italy; luca.chiesa@unimi.it

<sup>3</sup> Quality Department, Italian Retail Il Gigante SpA, Milan, Italy pessina@ilgigante.net

\* Correspondence: sara.panseri@unimi.it

**Table S1.** Main quantitative and qualitative (discriminant) applications of NIR spectroscopy to different fish and seafood species.

| Purpose                                    | Species                                                                                                                                                                                                          | Reference |
|--------------------------------------------|------------------------------------------------------------------------------------------------------------------------------------------------------------------------------------------------------------------|-----------|
| <b><i>NIR qualitative methodology</i></b>  |                                                                                                                                                                                                                  |           |
| Fresh vs. frozen                           | Swordfish ( <i>Xiphias gladius</i> )                                                                                                                                                                             | [29]      |
|                                            | Cuttlefish ( <i>Sepia officinalis</i> )                                                                                                                                                                          | [30]      |
|                                            | Gadidae family ( <i>Gadus morhua</i> , <i>Melanogrammus aeglefinus</i> )                                                                                                                                         | [31]      |
| Fresh vs. frozen                           | Cyprinidae family ( <i>Mylopharyngodon piceus</i> , <i>Ctenopharyngodon idellus</i> , <i>Hypophthalmichthys molitrix</i> , <i>Aristichthys nobilis</i> , <i>Cyprinus carpio</i> , <i>Parabramis pekinensis</i> ) | [32]      |
| Production method                          | Rainbow trout ( <i>Oncorhynchus mykiss</i> )                                                                                                                                                                     | [33]      |
| Production method                          | Sea bass ( <i>Dicentrarchus labrax</i> )                                                                                                                                                                         | [34]      |
| Geographical origin                        | Anchovies ( <i>Engraulis encrasicolus</i> )                                                                                                                                                                      | [35]      |
| Geographical origin                        | Sea cucumber ( <i>Apostichopus japonicus</i> )                                                                                                                                                                   | [36]      |
| <b><i>NIR quantitative methodology</i></b> |                                                                                                                                                                                                                  |           |
| TVB-N                                      | Grass carp ( <i>Ctenopharyngodon Idella</i> )                                                                                                                                                                    | [37]      |
| TBARS and OFR (fluorescence compounds)     | Saithe ( <i>Pollachius virens</i> ) and hoki ( <i>Macruronus novaezelandiae</i> )                                                                                                                                | [38]      |
| Pigments concentrations                    | Atlantic salmon ( <i>Salmo salar</i> )                                                                                                                                                                           | [39]      |
| Histamine                                  | Tuna                                                                                                                                                                                                             | [40]      |
|                                            | Bivalve molluscs ( <i>Saccostrea glomerata</i> , <i>Ostrea angasi</i> , <i>Crassostrea gigas</i> , <i>Mytilus galloprovincialis</i> , <i>Anadara trapezia</i> )                                                  | [41]      |
| Proximate composition                      | Tilapia                                                                                                                                                                                                          | [42]      |
| Fatty acids classes                        | Atlantic salmon ( <i>Salmo salar</i> )                                                                                                                                                                           | [43]      |
| Sodium chloride concentration              | Atlantic salmon ( <i>Salmo salar</i> )                                                                                                                                                                           | [44]      |
| TMA-N                                      | Silver carp ( <i>Hypophthalmichthys molitrix</i> )                                                                                                                                                               | [45]      |
| Texture profile analysis (TPA) parameters  | Crucian carp ( <i>Carassius carassius</i> )                                                                                                                                                                      | [46]      |
| Drip loss and pH                           | Atlantic salmon ( <i>Salmo salar</i> )                                                                                                                                                                           | [47]      |
| Freshness (days)                           | Atlantic salmon ( <i>Salmo salar</i> )                                                                                                                                                                           | [48]      |
| Color attributes (L*, a*, b*)              | Atlantic salmon ( <i>Salmo salar</i> )                                                                                                                                                                           | [49]      |
| Microbial loads                            | Rainbow trout ( <i>Oncorhynchus mykiss</i> )                                                                                                                                                                     | [50]      |
| Cadaverine                                 | Chub mackerel ( <i>Scomber japonicus</i> )                                                                                                                                                                       | [51]      |
